# Supplementary material for: Lack of CCDC146, a ubiquitous centriole and microtubule-associated protein, leads to non-syndromic male infertility in human and mouse
Source: eLife journal article supplement (doi:10.7554/elife.86845), 2023-04-12
Supplement: supp1 [file elife-86845-supp1-v1.pdf]

|               |     |                                                      |     |
|---------------|-----|------------------------------------------------------|-----|
| H.sapiens     | 1   | ----MEDSSTDTEKEEEEEK-----EKDQE-PI                    | 24  |
| P.troglodytes | 1   | ----MEDSSTDTEKEEEEEK-----EKDQE-PI                    | 24  |
| M.mulatta     | 1   | ----MDSINT-----                                      | 6   |
| C.lupus       | 1   | ----MEDSTTDTEQEEEEK-----EKDQEDPI                     | 25  |
| B.taurus      | 1   | ----MEDSTTDTEQEEEEK-----GKAQEDPI                     | 25  |
| M.musculus    | 1   | ----MEYNSKDAEEETEDEEEGLKEAEGEEQEKEEVTATSETDDDQEDLP   | 46  |
| R.norvegicus  | 1   | ----MEDRSKYIAEESSEDEED---EEQEEKEKGGASTSTETEEEDQEDIP  | 43  |
| G.gallus      | 1   | MRNLQKMSQAGDESSSSDEKE-----LEVEKEQPI                  | 30  |
| D.rerio       | 1   | --MMRQAQQRSSSPSHDDQOE-----SSERATPI                   | 27  |
| X.tropicalis  | 1   | MSSLGEEKAESSDSSTEEEEE-----VEEKPL                     | 27  |
|               |     |                                                      |     |
| H.sapiens     | 25  | YAIVPTINIQDERFVDLSETPAFIFLHELHAMGKLPGTRMAALKAKYTLL   | 74  |
| P.troglodytes | 25  | YAIVPTINIQDERFVDLSETPAFIFLHELHAMGKLPGTRMAALKAKYTLL   | 74  |
| M.mulatta     | 7   | -----LELHAMGKLPGTRMAELKAKYTLL                        | 30  |
| C.lupus       | 26  | YAIAPTINIQDERCVDLSTTPAFICLHELHSLGKLPGTRMAELKAKYTLL   | 75  |
| B.taurus      | 26  | YATAPTINIQDERFVDLSTTPAFICLHELHALGKLPGTRMAELKAKYTLL   | 75  |
| M.musculus    | 47  | SVLVPTVNIREERLINLAETPAFLCLHELHSGKLPGTRMAELKAKYTLL    | 96  |
| R.norvegicus  | 44  | SVIVPTINIREERLVDLAQTTPAFICLNLHTSGKLPGTRMAELKAKYTLL   | 93  |
| G.gallus      | 31  | CALAPTIVYTRDEGSTDVTSSPAFQCLDELFSAGKLTSSRVAELKAKYNLL  | 80  |
| D.rerio       | 28  | SALAPEVDLNQEPAVLSLNPALQCLEQLFSTGKISVEKVARLKASFNLL    | 77  |
| X.tropicalis  | 28  | YPVAPS-KVWGGDTKDIYASLAFQYLDELATSGKISGTRTAEKKEYTLL    | 76  |
|               |     |                                                      |     |
| H.sapiens     | 75  | HDAVMSTQESEVQLLQNAKRFTQIQQQQFHLQQADNFPFAFSTEVSKMR    | 124 |
| P.troglodytes | 75  | HDAVMSTQESEVQLLQNAKRFTQIQQQQFHLQQADNFPFAFSTEVSKMR    | 124 |
| M.mulatta     | 31  | HDAVMSTQESEVQLLQNAKRFTQIQQQQFHLQQADNFPFAFSTEVSKMR    | 80  |
| C.lupus       | 76  | HDTVVSTQESEVQLLQDAKRFTQIQQQQFHLQRADDFPEASTTEVSKMR    | 125 |
| B.taurus      | 76  | HDTVMSTQESEVQLLQDAKRFTQIQEQQFHLQQADNFPQAFTEVSKMR     | 125 |
| M.musculus    | 97  | HDTVVSTQESEVQLLENAKRFTQIQQQQVCLQQAEDFPNVFTTEVCKLR    | 146 |
| R.norvegicus  | 94  | HDTVVSTQESEVQLLENAKRFTQIQQQQVRLQEADDFPNVFTTEVSKLR    | 143 |
| G.gallus      | 81  | HETVRSLOESEIQLLQEAKRLSVDLEQQQHELEKAEQFPEESSEVCRIR    | 130 |
| D.rerio       | 78  | NETLRSSQDSEMQLLLEAKTLRMTLEQQRQELENAELFPEGPDTEVSRK    | 127 |
| X.tropicalis  | 77  | YQTLKRVQESEVKLLQDAKCF'TNQLEQQEW--EKSDQLYEDYNTEISTLR  | 124 |
|               |     |                                                      |     |
| H.sapiens     | 125 | EQLLKYQNEYNVAVKEREFNQYRLNSLKEEKIIIVKEFEKIKPGEMEKK    | 174 |
| P.troglodytes | 125 | EQLLKYQNEYNVAVKEREFNQYRLNSLKEEKIIIVKEFEKIKPGEMEKK    | 174 |
| M.mulatta     | 81  | EQLLKYQNEYNVAVKEREFNQYRLNSLKEEKIIIMKEFEKIPKPGEMEKK   | 130 |
| C.lupus       | 126 | EQLLKYQNEYNVAVKEREHTQYRLNSLTHEKNLIIKEFEKIPKPGEMEKK   | 175 |
| B.taurus      | 126 | EQLLKYQNEYNVAVKEREFNQYRLNSLVEEKNLIIKEFEKIPKPGEMEKK   | 175 |
| M.musculus    | 147 | EQLLKYQNEYTAQEREYNIQYRLTSLTEEKSIILKEFEKIPKPGEIEKK    | 196 |
| R.norvegicus  | 144 | EQLLKYQNEYTAVQEREYHTQYRLNSLTHEKSLVLEKEFEKIPKPGEIEKK  | 193 |
| G.gallus      | 131 | QQLLNCQNEYNVAVKEREHEIQFRICKLQEEKRLLLEKEYERIPKQGEADKK | 180 |
| D.rerio       | 128 | QTLQYYNQLKEDEERDYQMVFQLECLKEEKLYLEKEYQDQPKQAELESR    | 177 |
| X.tropicalis  | 125 | EQLLKYNNDINEAEREYSLOYKLECLQEEKLLQREYDRMPKAGDYEKK     | 174 |
|               |     |                                                      |     |
| H.sapiens     | 175 | MKILRESTEELRKEIMQKKLEIKNLREDLASKQKQLLKEQKELEELLGHQ   | 224 |
| P.troglodytes | 175 | MKILRESTEELRKEIMQKKLEIKNLREDLASKQKQLLKEQKELEELLGHQ   | 224 |
| M.mulatta     | 131 | MKILRESTEELRKEIMQKKLEIKNLREDLASKQKQLLKEQKELEELLEHQ   | 180 |
| C.lupus       | 176 | MRQLRESTEELRKEIMQKLEIKNLREDLASKQKQLLKEQKELEELLEECQ   | 225 |
| B.taurus      | 176 | MRLRESTEELRKEVMQKKLEIKNLREDLTSKQKQLLKEQKELEELLEYQ    | 225 |
| M.musculus    | 197 | TRLLKESTEELRKEVIQRRLEIKNLREDVVLKQKQLVREQKELEELMEYQ   | 246 |
| R.norvegicus  | 194 | TKLLKESTEELRKEVIQKRLEIKNLREDVVSQKQQLMKEQKELEELMDYQ   | 243 |
| G.gallus      | 181 | MRKMKEECDELHKEVIQRKAEVNAMKEDISSKQELMLIDKKEVEKLLLEDQ  | 230 |
| D.rerio       | 178 | YATLKNSCVEVRKEVLKLRQEVRTLTESMETQQKHKKQLELEDLKNRV     | 227 |
| X.tropicalis  | 175 | IKILQENIKELQKENTQRRMEIKALKEDLETKQRETEREQKELGQKLEQQ   | 224 |
|               |     |                                                      |     |
| H.sapiens     | 225 | VVLK---DEVAHQITIPVQIGKEIEKITRKKVEMEKKKIVLEQEVKTLND   | 271 |
| P.troglodytes | 225 | VVLK---DEVAHQITIPVQIGKEIEKITRKKVEMEKKKIVLEQEVKTLND   | 271 |
| M.mulatta     | 181 | VVLK---DEVAHQITIPVQIGKEIEKITRKKVEMEKKKIVLEQEVKNLND   | 227 |
| C.lupus       | 226 | VTLK---DEVVHQAVPVQIGKEIEKTTRKKVEMEKKKIVLEYELKELND    | 272 |
| B.taurus      | 226 | VTLK---DEVVHQSIIPVQIGKEIEKTTRKKVEMEKKKIVLEYELKELND   | 272 |

|               |     |                                                      |     |
|---------------|-----|------------------------------------------------------|-----|
| M.musculus    | 247 | VGLK---DDVVHHQSVPVQITKEIEKMTRKKVETEKKNIVLESELKELSD   | 293 |
| R.norvegicus  | 244 | VGLK---DDVVHHQSVPVQITKEIEKLTRRKIETEKKNVVLEFELKELSD   | 290 |
| G.gallus      | 231 | DSLKVTQDELVKILGVPVQLKKEAEKINQKKIDAEKKNEDLNNQMQLNS    | 280 |
| D.rerio       | 228 | ESNE---AELAQVLLIPVQLRKEVDRVAHKKSELEKQVAKIEQHRLDNVE   | 274 |
| X.tropicalis  | 225 | EVVK---HELVQLSYVPLQIGKETEKINRRIMEAQKKENMLGKEFQELND   | 271 |
|               |     |                                                      |     |
| H.sapiens     | 272 | SLKKVENKVSIAIVDEKENVIKEVEGKRALLEIKEREHNQLVKLLELAREN  | 321 |
| P.troglodytes | 272 | SLKKVENKVSIAIVEEKENVIKEVEGKRALLEIKEREHNQLVKLLELAREN  | 321 |
| M.mulatta     | 228 | SLKKVENKVSIAIVEEKENVIKEVEGKRALLEIKEREHNQLVKLLELAREN  | 277 |
| C.lupus       | 273 | SLKKVETKINSIMEEKEDVIKEVEGKRALLEIKEREYNQLVKLLELTRVS   | 322 |
| B.taurus      | 273 | SLKKVETKINAVMEEKEDVIKEVEGKRALLEIKEREYNQLVKLLELTREN   | 322 |
| M.musculus    | 294 | SLKKLENKVNLTAAERDDIMKEVEGKRTLLEVKEREYQQLKLELTKEN     | 343 |
| R.norvegicus  | 291 | SLKKLENKVSALAEERDDTIKEVEGKRTLLEVKEREYQQLKLELTKEN     | 340 |
| G.gallus      | 281 | TLNDIDKGTEKILQEREDVMKELDGKRALLEESKEQCAALARLLEIGREK   | 330 |
| D.rerio       | 275 | HQKSLEAKCEKVKEAIEKVVREQEGHKAQLVTAENKQDRLLTDLQMAKAK   | 324 |
| X.tropicalis  | 272 | NLKQMEHKAKLMLLEEKEEVMKELEGKQTWLETKEQECNRLTKLLELAKEN  | 321 |
|               |     |                                                      |     |
| H.sapiens     | 322 | EATSLTER-----GILDLNLRNSLIDKQNYHDELSR                 | 352 |
| P.troglodytes | 322 | EATSLTER-----GILDLNLRNSLIDKQNYHDELSR                 | 352 |
| M.mulatta     | 278 | EATSLTER-----GILDLNLRNSLIDKQNYHDELSR                 | 308 |
| C.lupus       | 323 | EATSLTER-----GILDLNLRNCLIDKQNYHDELSR                 | 353 |
| B.taurus      | 323 | EASSLTER-----GILDLNLRNCLIDKHNYHDELSR                 | 353 |
| M.musculus    | 344 | EASSLAER-----GILDINLRNCLIDKQNYHDELSR                 | 374 |
| R.norvegicus  | 341 | EASSLAER-----GILDINLRNCLMDKQNYHDELSR                 | 371 |
| G.gallus      | 331 | QLAILVER-----DSLNQKLNERIFEKKQQQETLIY                 | 361 |
| D.rerio       | 325 | EAAFMDQRSLSLFQHCNINAKHIQIHLVGLLEISMEQIVAEFISLRDKLAR  | 374 |
| X.tropicalis  | 322 | EVALGER-----AAMDLSLRHAMVEKQTDHALTR                   | 352 |
|               |     |                                                      |     |
| H.sapiens     | 353 | KQREKERDFRNLRKMELELLKVSWDALRQTQALHQRLLEMEAI PKDDSTL  | 402 |
| P.troglodytes | 353 | KQREKERDFRNLRKMELELLKVSWDALRQTQALHQRLLEIEAI PKDDSTL  | 402 |
| M.mulatta     | 309 | KQREKERDFRNLRKMELELLKVSWDALRQTQAMHQRLLEIEAI PKDDSTL  | 358 |
| C.lupus       | 354 | KQREKERDFRNLRKMELELLKVSWDALRQTQALHQRLLEIEAI PKDDSTL  | 403 |
| B.taurus      | 354 | KQREKERDFRNLRKMELELLKVSWDALNQTQALHQRLLEIEAI PKDDSTL  | 403 |
| M.musculus    | 375 | KQREKERDFRNLRKMELELLKVSWDALRQTQAMNQRLLEMEAI PKYLTTL  | 424 |
| R.norvegicus  | 372 | KQREKERDFRNLRKMELELLKVSWDALRQAQALNQRLLEMEAI PKEDLLL  | 421 |
| G.gallus      | 362 | MQGEKDKELRNLRKMELELLKVSWDALRQAQALNQRLLEMEAI PKINGVL  | 411 |
| D.rerio       | 375 | DTRLKDKLMLALKRNELQLKQARDALRNTQQQHERIQAQKETVSEADILL   | 424 |
| X.tropicalis  | 353 | KTREKERDLRNTKMELELLKVSWDALRQAQALNQRLLEMEAI PKADALL   | 402 |
|               |     |                                                      |     |
| H.sapiens     | 403 | SERRRELHKEVEVAKRNLAQQKIISEMESKLVEQQLAENKLLKEQENMK    | 452 |
| P.troglodytes | 403 | SERRRELHKEVEVAKRNLAQQKIISEMESKLVEQQLAENKLLKEQENMK    | 452 |
| M.mulatta     | 359 | SERRRELHKEVEVAKRNLAQQKIISEMESKLVEQQLAENKLLKEQENMK    | 408 |
| C.lupus       | 404 | SERRRELHKEVEVAKRNLAQQKILSEAETKLVEQQLAENKLLKEQENMR    | 453 |
| B.taurus      | 404 | SERRRELHKEVEVAKRNLTQQKILSEAESKLVEQQLAENKLLKEQENIQ    | 453 |
| M.musculus    | 425 | PERRKELHKEVDLARRNLAQQKSLSEAEAKLVEQQIAQENKLLKEQESLR   | 474 |
| R.norvegicus  | 422 | PEQRKELHKEVDLAKRNLAQQRSLSAEAEAKLVEQQIAEENKLLKEQETMR  | 471 |
| G.gallus      | 412 | LERRRELQKEIEMKKRCLAEQEMVSDTDARRLEECIAEEGRLFKEQEKCR   | 461 |
| D.rerio       | 425 | -ERRKLEKEVENLKRNL-----                               | 442 |
| X.tropicalis  | 403 | -EKRKELRKEVEVIRRQFAQQQTLEAEAHTEQCIAEEEEQLVKEQSERR    | 451 |
|               |     |                                                      |     |
| H.sapiens     | 453 | ELVVNLLRMTQIKIDEKEQKSKDFLKAQQKYTNIVKEMKAKDLEIRIHKK   | 502 |
| P.troglodytes | 453 | ELVVNLLRMTQIKIDEKEQKSKDFLKAQQKYTNIVKEMKAKDLEIRIHKK   | 502 |
| M.mulatta     | 409 | ELVFNLVRMTQIKIDEKEQKSKDFLKAQQKYTNIVKEIKAKDLEIRIHKK   | 458 |
| C.lupus       | 454 | DVVFNLRMTQIKIDEKQKSKDFLKAQQRYTNIVKEIKTKDLEIRIHKK     | 503 |
| B.taurus      | 454 | ELLFNLVRMTQIKIDEKEQKSKDFLKAQQKYTSIVREIKAKDLEIRIHRK   | 503 |
| M.musculus    | 475 | ELVFNLGRMTQIKIDEKEQKAKDFLKAQRRYSEIVKEIKSKDLEIRLYKK   | 524 |
| R.norvegicus  | 472 | EVLFNLRMTQIKIMEEKEQKAKDFLKSQRRYCDI KEIKSKKLEIRLYRK   | 521 |
| G.gallus      | 462 | SELSRLAHLTWLKVVEEKEQKSREVQKVQIQQLQNI KEIKRKDLEIEEYKK | 511 |
| D.rerio       | 443 | -----SELKYKQSKQELQGGGLVIEQHIK                        | 466 |
| X.tropicalis  | 452 | EDLVNLRTRLVQIKAEEREQKSRDLIKAKQRYQQVQLQEVKGRQLIIGEHKK | 501 |
|               |     |                                                      |     |
| H.sapiens     | 503 | KKCEIYRRLREFAKLYDTRNERNKFVNLLHKAHQKVNEIKERHKMSLNE    | 552 |

|               |     |                                                        |     |
|---------------|-----|--------------------------------------------------------|-----|
| P.troglodytes | 503 | KKCEIYRRLREFAKLYDTIRNERNKFVNLLHRAHQKVNEIKERHKMSLNE     | 552 |
| M.mulatta     | 459 | KKCEIYRRLKEFAKLYDTIRNERNKFVNLLHKAHQKVNEIKERHKMSLNE     | 508 |
| C.lupus       | 504 | KKREIHRRLKEFAKLYDTIRNERNKFVNLLHKAHQKVNEIKERHKMLLNE     | 553 |
| B.taurus      | 504 | KKREIHRRLREFAKLYDTIRNERNKFINLLHKAHQKVNEIKERHKMSLNE     | 553 |
| M.musculus    | 525 | RKHEIHRRLREFASLYDTIRNERNKFVNLLHKAHQKVNEIKERLKMMSLNE    | 574 |
| R.norvegicus  | 522 | RKREIHRRLKEFAGLYDAIRNERNKFVNLLHKAYQKVNEIKERLKMMSLNE    | 571 |
| G.gallus      | 512 | RKRRVHKQLQGVANMCDVIKNERNKCMHLVNVAQQKTAEIEDRIKVKASE     | 561 |
| D.rerio       | 467 | QTKETQTRL-----                                         | 475 |
| X.tropicalis  | 502 | KNQDVQKRLKEFAKMYDIIRNERNKCVSLIQTAMQRASELREKLKIFANE     | 551 |
|               |     |                                                        |     |
| H.sapiens     | 553 | LEILRNSAVSQERKLQNSMLKHANNVTIRESMQNDVRKIVSKLQEMKEKK     | 602 |
| P.troglodytes | 553 | LEILRNSAVSQERKLQNSMLKHANNVTIRESMQNDVRKIVSKLQEMKEKK     | 602 |
| M.mulatta     | 509 | LEILRNSAVSQERKLQNSMLKHANNVTIRESMQNDVRKIASKLQEMKEKK     | 558 |
| C.lupus       | 554 | LEILRNSAVTQERKLQNSMLKHANNVTIRESMQNDVHKIVAKLQEMKEKK     | 603 |
| B.taurus      | 554 | LEILRNSAVTQERKLQNSMLKHANNITIRESMQNDVCKIVAKLQEMKEKK     | 603 |
| M.musculus    | 575 | LEILRNSAVSQERKLQNSMLKHANNVTIKESIQNVDVCKITAKLQEMKEKK    | 624 |
| R.norvegicus  | 572 | LEILRSAVSQERKLQNSMLKHANNVTIKESIQNVDVCKITAKLQEMKEKK     | 621 |
| G.gallus      | 562 | IETLRNTLITQERELQKQHMKNNAAIKESLKNDCSKVAQVMYEMNEKK       | 611 |
| D.rerio       | 476 | -----LQRSRLQSHSYKLRDDLKKEVSQTLQALQEMQQNR               | 511 |
| X.tropicalis  | 552 | MEILRNNAVNKDRQLQKIKLKENNSQMVRDSLQKDLRVRVYLEEMKEKR      | 601 |
|               |     |                                                        |     |
| H.sapiens     | 603 | EAQLNNDRLANTITMIEEEMVQLRKRYEKAVQHRNESGVQLIEREEEEIC     | 652 |
| P.troglodytes | 603 | EAQLNNDRLANTITMIEEEMVQLRKRYEKAVQHRNESGVQLIEREEEEIC     | 652 |
| M.mulatta     | 559 | EAQLNNDRLANMITMIEEEMVQLRKRYEKAVQHRNESGVQLIEREEVVC      | 608 |
| C.lupus       | 604 | EAQLNNDRLASMITTVEEEMVQLRKRYEKAVQRRNESGVQLIQREEEVC      | 653 |
| B.taurus      | 604 | EAQLNNDRLANMITMIEEEMVQLRKRYERAVQRRNESGVQLIEREEVVC      | 653 |
| M.musculus    | 625 | EAQLTSMDRASMITVIEEEMVQLRKRYEKAVQRRNESGVQLIEREEVVC      | 674 |
| R.norvegicus  | 622 | EAQLTSMDRASMITVIEEEMVQLRKRYEKAVQRRNESGVQLIEREEVVC      | 671 |
| G.gallus      | 612 | KQVLDLDDLGLTNAVTRIEEIIAQLHKKYKRATEEQTESGLLLRSREEEIC    | 661 |
| D.rerio       | 512 | EEQKLLRKLTDVTNMLEQKHLICKRYEAEELQKRNQESVQLAEREKEWR      | 561 |
| X.tropicalis  | 602 | EQQKMQIGRLTNMINQAEVDMIQLRKKYQTAVQNRNERGVQLIEREEEEIC    | 651 |
|               |     |                                                        |     |
| H.sapiens     | 653 | IFYEKINIQEKMKLNGEIEIHLLLEEKIQFLKMKIAEKQRQICVTQKLLPA    | 702 |
| P.troglodytes | 653 | IFYEKINIQEKMKLNGEIEIHLLLEEKIQFLKMKIAEKQRQIRVTQKLLPA    | 702 |
| M.mulatta     | 609 | IFYEKINIQEKMKLNGEIEIHLLLEEKIRFLKMKIAEKQRQICVTQKLLPA    | 658 |
| C.lupus       | 654 | IFYEKINIQEKMKLNGEIEIHVLEEKIRFLKMKIAEKQRQIHVTQKLLPT     | 703 |
| B.taurus      | 654 | IFYEKINIQEKMKLNGEIELHVLEEKIRFLKMKIAEKQRQIHVTRKLLPV     | 703 |
| M.musculus    | 675 | IFYEKVNVQEKIKLHQDVEIHIILEEKIRFLKMKIAEKQRQISVTRKLVPI    | 724 |
| R.norvegicus  | 672 | IFYEKMNIQDKVKLHQDIEIHIILEEKIRFLKMKVAEKQRQICVTQKLVPI    | 721 |
| G.gallus      | 662 | I LYEKINAQEF LCRKGDIE MQATDEKISFLKMKVAEKERQIKFWL KALPM | 711 |
| D.rerio       | 562 | IFNEKLGVLVKMTENS NLEMYDMEDEIRNLKMEQKEEERQNDLHKKQLSN    | 611 |
| X.tropicalis  | 652 | IFLEKINIQEMILRNGDLEMVSMDEKIRFLKIEAAEQKRQVEQLQKNLPN     | 701 |
|               |     |                                                        |     |
| H.sapiens     | 703 | KRSLDADLAVLQIQFSQCTDRIKDLEKQFVKPDGENRARFLPGKDLTEKE     | 752 |
| P.troglodytes | 703 | KRSLDADLAVLQIQFSQCTDRIKDLEKQFVKPDGENRARFLPGKDLTEKE     | 752 |
| M.mulatta     | 659 | KRSLDADLAVLQIQFSQCTDRIKDLEKQFIKPDGENRARFLPGKDLTEKE     | 708 |
| C.lupus       | 704 | KRALDADLAVLQIQFSQCTERIKDLEKQFINPDGENRIRFIPGKDMTQEE     | 753 |
| B.taurus      | 704 | KSALDADLAVLQIQFSQCTDKIKDLEKQFINPEGENRTRLLPGKDMTEEE     | 753 |
| M.musculus    | 725 | KKSLDADLAVIQIQFSQCTDRIKDLEKLFVNPDSKGRVRFIKGKDLTEEE     | 774 |
| R.norvegicus  | 722 | KKSLDANLAVVQIQFSQCADRIKALEKCFVNPDCQGRVRFIPGKDLTEEE     | 771 |
| G.gallus      | 712 | KRVLDAELVVLQIQYSQCKDRIKEMEEIFVDPTNESRKRDLGGKDP SAPE    | 761 |
| D.rerio       | 612 | KLAL EEERVLLQIQ LSEINDRVSELEEACVD---DNRARNLNGEDPSPEE   | 658 |
| X.tropicalis  | 702 | KRMLES DLVTLQIQLSQCNDRVAELETQTEDPGKEYRTRLLLEGKDP SLQE  | 751 |
|               |     |                                                        |     |
| H.sapiens     | 753 | MIQKLDKLELQLAKKEEKLEKDFIYEQVSRLTDRLCSKTQGCQD TLLL      | 802 |
| P.troglodytes | 753 | MIQKLDKLELQLAKKEEKLEKDFIYEQVSRLTDRLCSKTQDCQD TLLL      | 802 |
| M.mulatta     | 709 | MIKKLDKLELQLAKKEEKLEKDFIYEQVSRLTDRLCSKTQDCQD TLLL      | 758 |
| C.lupus       | 754 | MIKKLDSLELQLAQKKEEKLEKDFIYEQVSRLTDRLCSKTQAYKQD TLLL    | 803 |
| B.taurus      | 754 | MIKKMDELELQLAKKEEKLEKDFIYEQVSRLTDRLYSKTQACKQD TLLL     | 803 |
| M.musculus    | 775 | MIKKLDMLELQIAKKEEKLEKDFIYEQVSQLTNRLKGTQACKKDT LLL      | 824 |
| R.norvegicus  | 772 | MIKKLDMLELQLAKKEEKLEKDFIYEQVSQLTNRLKTKTQACKMD TLLL     | 821 |
| G.gallus      | 762 | LQKKIKQLEVELVQKKEEKLETDIIYQHIARLTDRI RATAENGGQT LLLL   | 811 |
| D.rerio       | 659 | LIEKIEQLEIHLADKEAQLLEMELVCEQVGRLSKR IQIKADNSNED T LHL  | 708 |

|               |     |                                                      |     |
|---------------|-----|------------------------------------------------------|-----|
| X.tropicalis  | 752 | LMKKTEELEHLHAQKEEQLLKDLLYEQVSHLTKKIHTKAENKQDTLLL     | 801 |
| H.sapiens     | 803 | AKKMNGYQRRIKNATEKMMALVAELSMKQALTIELQKEVREKEDFIFTCN   | 852 |
| P.troglodytes | 803 | AKKMNGYQRRIKNATEKMMALVAELSMKQALTIELQKEVREKEDFIFTCN   | 852 |
| M.mulatta     | 759 | AKKMNGYQRRIKNATEKMMAVVAELSMKQALTIELQKEVREKEDFIFTCN   | 808 |
| C.lupus       | 804 | AKKMNGYRKKIKDATEQMMALVAELSMKQALAIELQKEVREKEDFIFTCN   | 853 |
| B.taurus      | 804 | AKKMNGYQKKIKDATEKMMALVAELSMKQAMAIELQKEVKEKEEFIFTCN   | 853 |
| M.musculus    | 825 | AKKMNSYQKKIKVVTQEMMALVAELSMKQALTIELQKEVREKEEFIFSCS   | 874 |
| R.norvegicus  | 822 | AKKMNSYQKKIKDVTQEMMALVAELSMKQALTIELQKEVREKEEFIFSCS   | 871 |
| G.gallus      | 812 | ATRINELQKKIKDRTQKMMALVAELSMKQALAIKIQQEMRDREEFIMIVS   | 861 |
| D.rerio       | 709 | AKKVNELQAQIRKRSRKMMAVVAELSMRKAECMGLQQEMKEKELQLDLCQ   | 758 |
| X.tropicalis  | 802 | SKKMNELHKKIKNTTQKMSLIAELSMQOANSIKLQEEELRNKEKMVEACH   | 851 |
| H.sapiens     | 853 | SRIEKGLPLNKEIEKEWLKVLRDEEMHALAIAEKSQEFLEADNRQLPNGV   | 902 |
| P.troglodytes | 853 | SRIEKGLPLNKEIEKEWLKVLRDEEMHALAIAEKSQEFLEADNRQLPNGV   | 902 |
| M.mulatta     | 809 | SRIEKGLPLNKEIEKEWLKVLRDEEMHALALAEKPQSSLEADNRQMPNGV   | 858 |
| C.lupus       | 854 | SRIEKGLPLNKDIETEWLKI LRDEEMYALAVA EKSREFLVSDNRQLPNGV | 903 |
| B.taurus      | 854 | SRMEKGLPLNKEIEREWLKVLRDEEMYAMAIAEKSREFLEAETRQLPNGV   | 903 |
| M.musculus    | 875 | ARIEKGLPLNREIEKDWLKVLRDEEMYAFATAEMSREYMETDYRQLPNGV   | 924 |
| R.norvegicus  | 872 | SRIEKGLPLNREIEKDWLKVLRDEEMYAFATAEKTREYIDTDYRQLPNGV   | 921 |
| G.gallus      | 862 | SRIDQGLPPPKEIEI EWLKVL RNEKMHKEAAEARARQAAEEEQAAVPGHV | 911 |
| D.rerio       | 759 | KHVEQGLPPSDSIENEWLRHLQDQHRRLADAERKAMLAEEDEWNL PNGV   | 808 |
| X.tropicalis  | 852 | TRMEQGLPPSEGTENEWK MIRDK HRLQKEKEDKARMAEEEEQH WLPNGA | 901 |
| H.sapiens     | 903 | YTTAEQRPNAYIPEADATLPLPKPYGALAPFKPSEPGANMRHIRKPKVIKP  | 952 |
| P.troglodytes | 903 | YTTAEQRPNAYIPEADATLPLPKPYGALAPFKPSEPGANMRHIRKPKVIKP  | 952 |
| M.mulatta     | 859 | YTTAEQRPNAYIPEAEATLPLPKPYGALAPFKPSEPGANMRHIRKPKI IKP | 908 |
| C.lupus       | 904 | YTTAEQRPNAYIPEAEALPLPKPYGALAPFKPSEQGANMRHIRKPVPKP    | 953 |
| B.taurus      | 904 | YTTAEQRPNAYIPEAEATLPLPKPYGALAPFKPSEPGANIRHIRKPKVIKP  | 953 |
| M.musculus    | 925 | YTTAEQRPNAYMPEADTELPLPKPYGAMAPFKPSEPGANRRHIRKPVVKP   | 974 |
| R.norvegicus  | 922 | YTTAEQRPNAYIPEADATLPLPKPYGALAPFKPSEPGANRRHIRKPKI IKP | 971 |
| G.gallus      | 912 | LTAEPRPTAYVDDAYS LVPVPRPYGALAPFKPSEPGSNIRHFRKPKI IKP | 961 |
| D.rerio       | 809 | YTTAELRPNAYIPIDD-PLVPKHYGALAPFKPTEPGANIRHIRKPKI IKP  | 857 |
| X.tropicalis  | 902 | YTTAEQRPNAYIPDESALPLPRPYGILAPFKPSETGSNMRHIRKPKI IKP  | 951 |
| H.sapiens     | 953 | VEI                                                  | 955 |
| P.troglodytes | 953 | VEI                                                  | 955 |
| M.mulatta     | 909 | IEI                                                  | 911 |
| C.lupus       | 954 | IEI                                                  | 956 |
| B.taurus      | 954 | IEI                                                  | 956 |
| M.musculus    | 975 | IEI                                                  | 977 |
| R.norvegicus  | 972 | IEI                                                  | 974 |
| G.gallus      | 962 | IEI                                                  | 964 |
| D.rerio       | 858 | IEI                                                  | 860 |
| X.tropicalis  | 952 | IEI                                                  | 954 |
